# Supplementary material
Source: PubMed Central journal article supplement (PMC8117747)
Supplement: NIHMS1043812-supplement-Supp_figS1-3.pdf [file NIHMS1043812-supplement-Supp_figS1-3.pdf]

# Supplemental Fig. 1

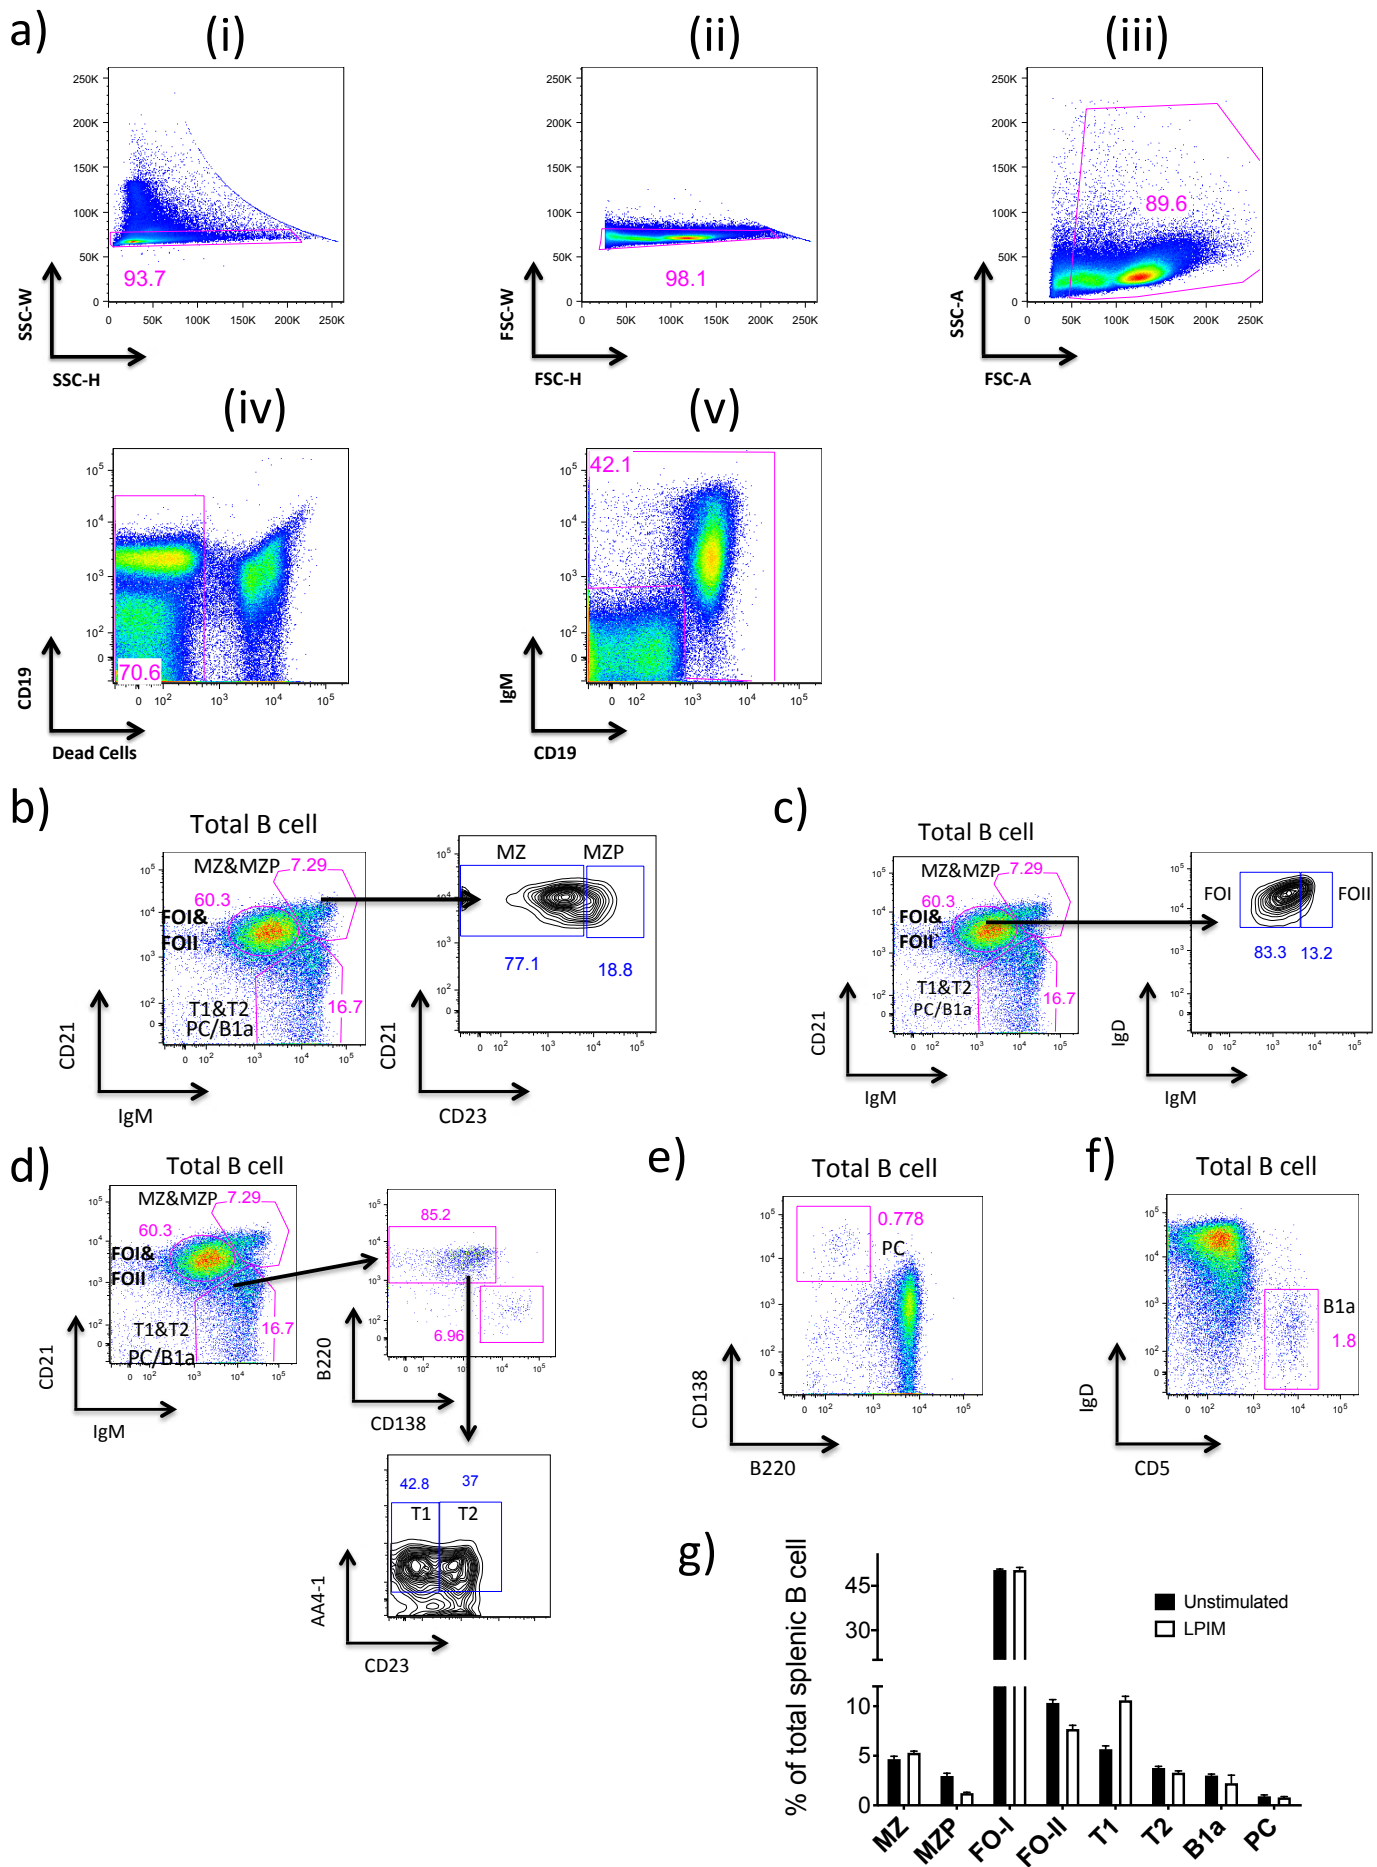

**Supplemental Figure 1: Gating strategy to examine IL-10 expression in various B cell subsets.** **a)** Gating strategy for total B cells. (i) SSC-W/SSC-H and (ii) FSC-W/FSC-H doublet exclusion, (iii) splenocyte gating, (iv) dead cell exclusion gate, (v) gating on B cells using CD19 and IgM. **b)** Gating shown to examine marginal zone (MZ: IgM<sup>hi</sup>, CD21<sup>hi</sup>, CD23<sup>lo/-</sup>) and marginal zone precursor (MZP: IgM<sup>hi</sup>, CD21<sup>hi</sup>, CD23<sup>hi</sup>) B cell subsets. **c)** Gating shown to examine follicular I (FOI: IgD<sup>hi</sup>, IgM<sup>lo</sup>, CD23<sup>hi</sup>) and follicular II (FOII: IgD<sup>hi</sup>, IgM<sup>int</sup>, CD23<sup>hi</sup>) B cell subsets. **d)** Gating shown to examine transitional 1 (T1: IgM<sup>hi</sup>, IgD<sup>-</sup>, CD21<sup>-</sup>, CD23<sup>-</sup>, B220<sup>+</sup>, AA4.1<sup>+</sup>) and Transitional 2 (T2: IgM<sup>hi</sup>, IgD<sup>-</sup>, CD21<sup>-</sup>, CD23<sup>+</sup>, B220<sup>+</sup>, AA4.1<sup>+</sup>) B cell subsets. **e)** Gating shown to examine plasma cell/plasmablast (PC: IgM<sup>hi</sup>, IgD<sup>-</sup>, CD21<sup>-</sup>, B220<sup>-</sup>, CD138<sup>+</sup>) B cell subset. **f)** Gating shown to examine B1a B cell subset. **g)** Summary graphing showing the frequency of each subset from total splenic B cells before and after stimulation with LPIM.

# Supplemental Fig. 2

a)

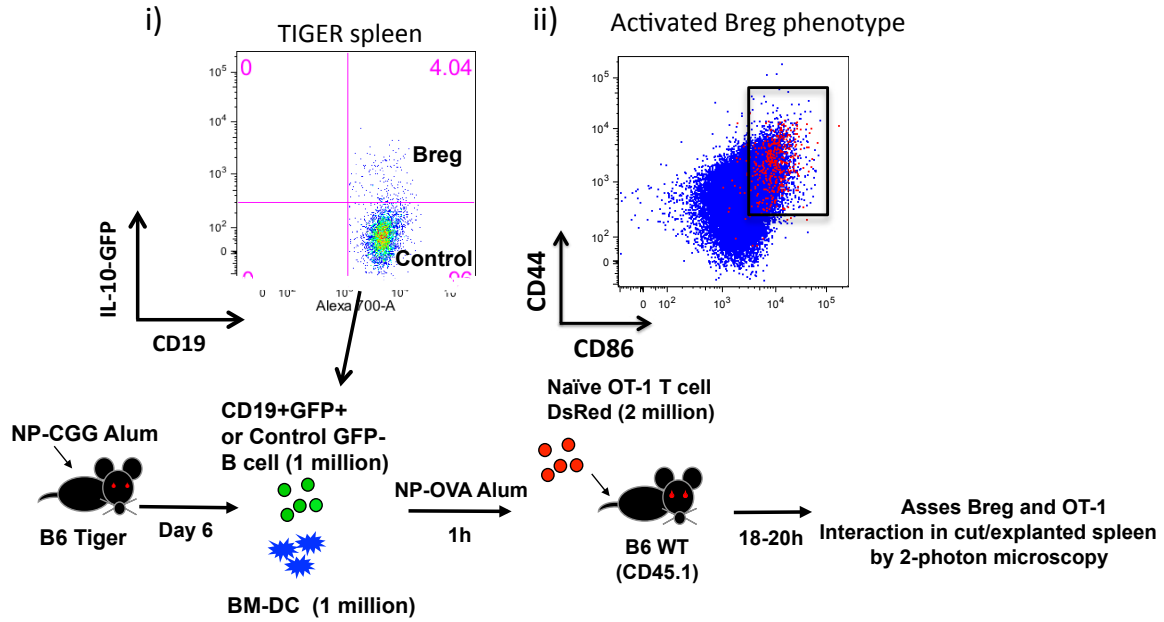

b)

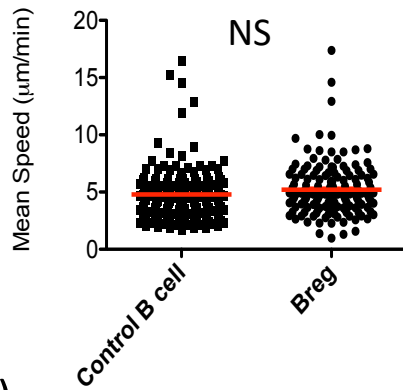

c)

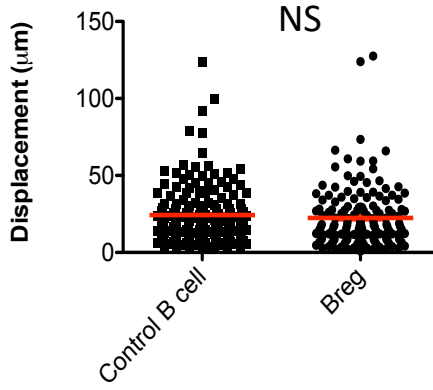

d)

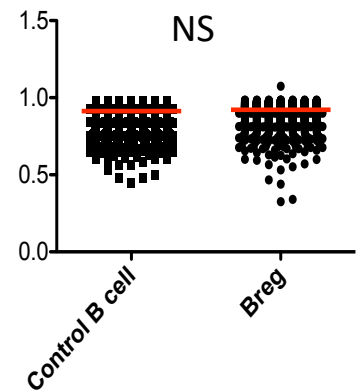

e)

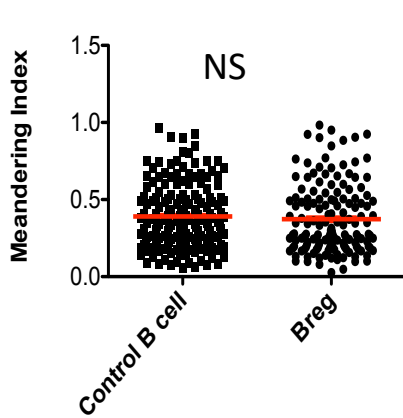

f)

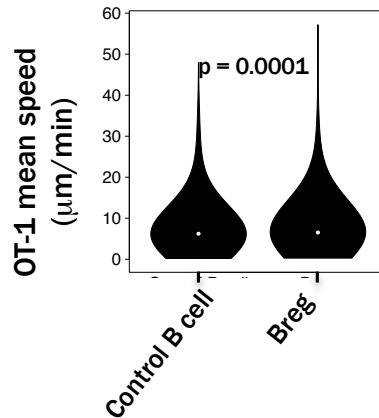

g)

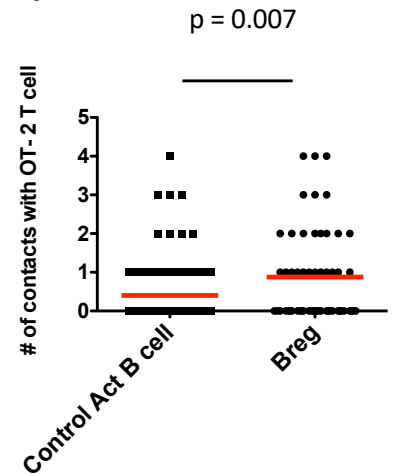

h)

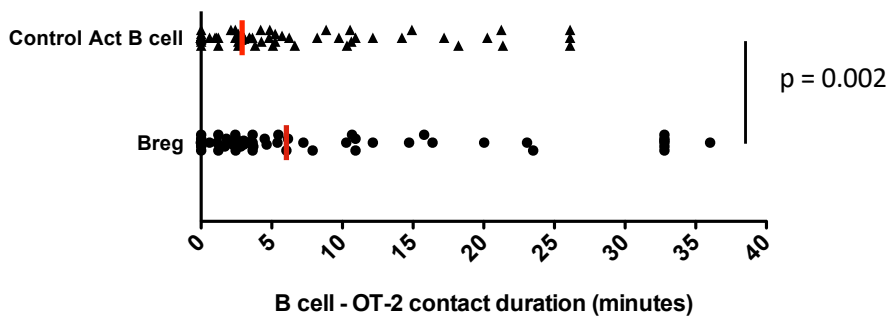

**Supplemental Figure 2: Experimental procedure and motility parameters derived from 2 photon imaging of Bregs vs. Control B cells.** **a)** Breg (GFP+) (i), Control B cells (GFP-) (i) or Control Activated B cells (ii) were sorted from NP-CGG immunized Tiger mice with BD FACSAria on day 6-7 after immunization. Gate shows CD44 and CD86 expression level of Breg (pink) over-layed on total B cells (blue). Control activated B cells (GFP-) were sorted from within this gate. The sorted cells were stained briefly with 1.5mM CFSE and pulsed with 10 $\mu$ g/ml of NP-OVA for one hour. Bone marrow derived DC's (BMDC), generated using GM-CSF and IL-4 using a standard 7 day culture system, were treated with 100ng/ml of LPS for 5-6 hours and pulsed with 10 $\mu$ g/ml of NP-OVA for 1 hour. One million of both B cells and DCs were adoptively transferred into WT CD45.1 mice that had received 2 million naïve DsRed OT-1 the day before. After 18-20h, spleens from the recipient mice were removed and cut with a vibratome in order to facilitate imaging of the white pulp. Unused cut pieces of the spleen were snap frozen in OCT for further analysis by immunofluorescence staining. **b-g):** Graphs comparing motility parameters of Control B cells vs. Bregs as analyzed using Bitplane Imaris software. (Each dot represents one cell and red horizontal lines indicate mean for each graph). **b)** Mean speed of Control B cell vs. Bregs. **c)** Displacement of Control B cell vs. Bregs. **d)** Sphericity of Control B cell vs. Bregs. **e)** Meandering index of Control B cell vs. Bregs. **f)** Violin plot showing mean speed of OT-1 T cells obtained from all movies where recipient mice received either Control B cell or Bregs. **g)** The number of contacts individual (NP-OVA pulsed) Control Activated B cells or Bregs made with OT-2 T cells. **h)** Duration (minutes) of each contact made by Control Activated B cell or Bregs with OT-2 T cells. n = 2-5 mice for each group.

# Supplemental Fig. 3

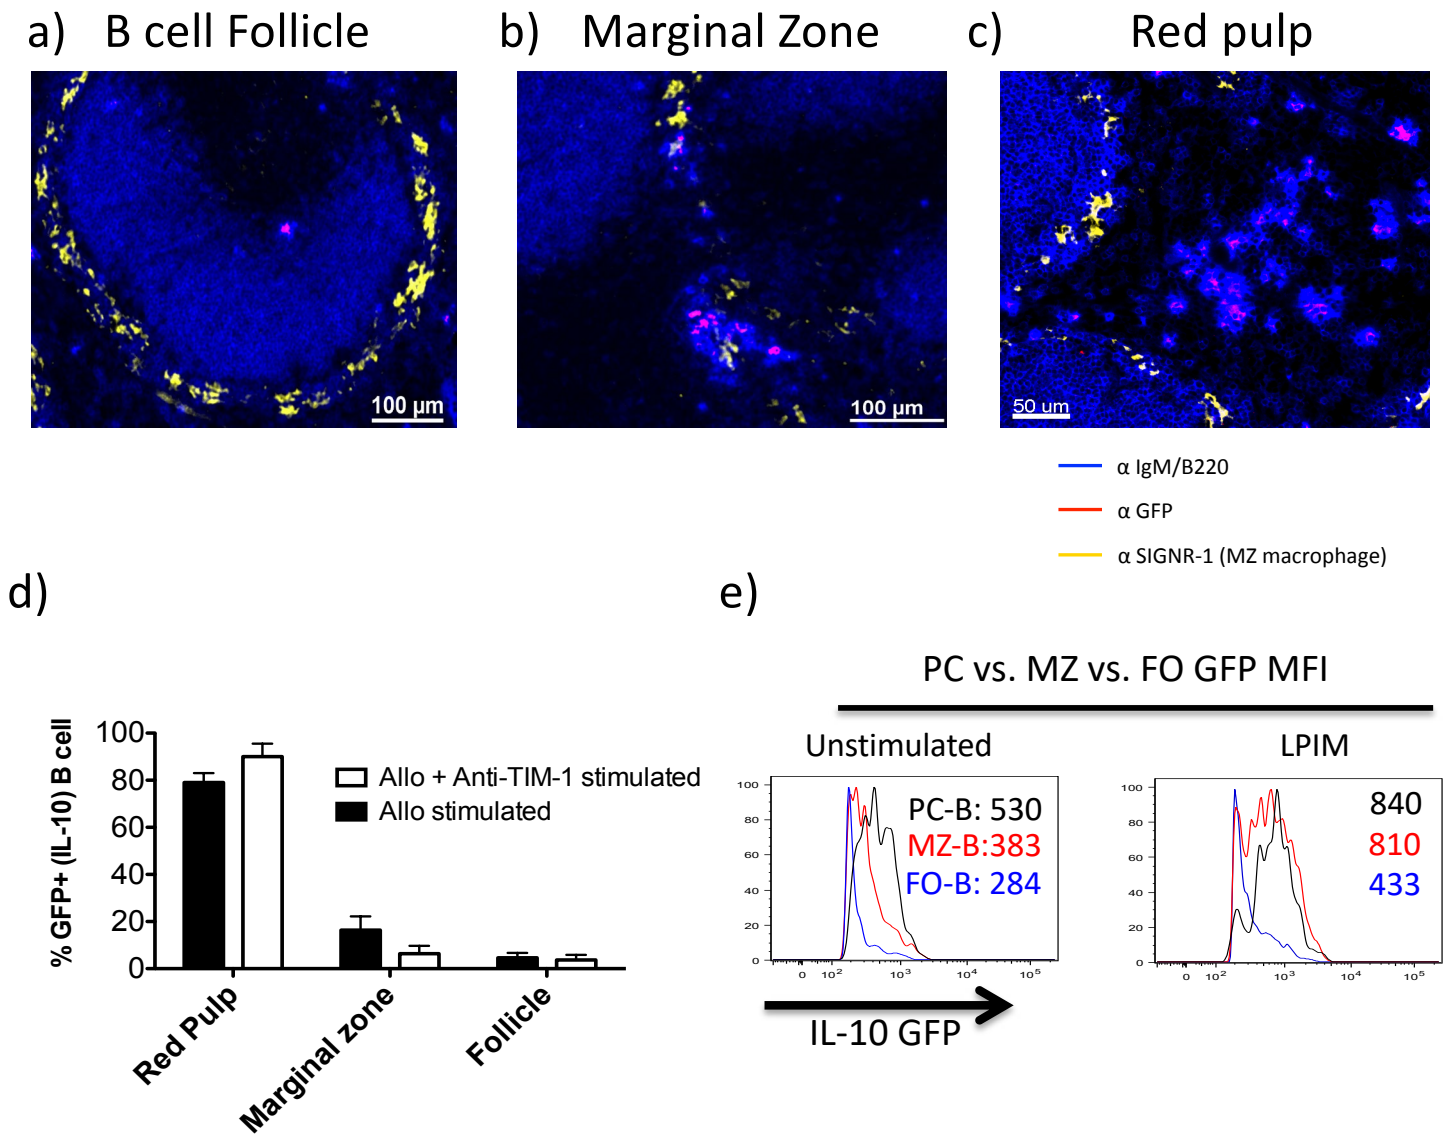

**Supplemental Figure 3: Immuno-fluorescent images showing Breg localization in immunized Tiger spleens.** **a)** Immuno-fluorescent image of a IL-10-GFP reporter mouse spleen immunized with allo-antigen for 72 hours and stained for B cells (anti-IgM/B220 - blue), marginal zone macrophage (anti- SIGNR-1- yellow) and IL-10-GFP (anti-GFP – red) showing a B cell follicle with Breg localized to T:B border, **b)** Breg localized to MZ, **c)** Breg localized to red pulp . **d)** Graph showing cumulative frequency of Breg in immunized IL-10-GFP reporter mice spleens with and without anti-TIM-1 treatment. n = 3-5 mice per group.
