# Supplementary material
Source: PubMed Central journal article supplement (PMC8117747)
Supplement: NIHMS1043812-supplement-Supp_legends.pdf [file NIHMS1043812-supplement-Supp_legends.pdf]

## **Description of Supplemental Movies**

**Supplemental Movie 1.** Two-photon imaging showing a maximum intensity projection movie of the localization and interaction of Control B cells (red) with OT-1 T cells (blue). Representative of 17 movies.

**Supplemental Movie 2.** Two-photon imaging showing a maximum intensity projection movie of the localization and interaction of Breg (red) with OT-1 T cells (blue). Representative of 14 movies.

**Supplemental Movie 3.** Two-photon imaging showing a blend mode movie, gives a 3D view of cells, zoomed in on one Breg (red) specifically for the duration of the movie to highlight it making contacts with several OT-1 T cells (blue). Line shows track length, path and elapsed time. Representative of 14 movies.

**Supplemental Movie 4.** Two-photon imaging showing a blend mode movie zoomed in to show close proximity of Control B cells (green), OT-1 T cells (blue) and BMDC (pink) and highlight a lack of interaction between Control B cells and BMDC. Representative of 9 movies.

**Supplemental Movie 5.** Two-photon imaging showing a blend mode movie zoomed in to show close proximity of Breg (green) with OT-1 T cells (blue) and BMDC (pink) and highlight a lack of interaction between Bregs and BMDC. Representative of 10 movies.

**Supplemental Movie 6.** Large stitched together immune-fluorescent image of an allo-immunized Tiger mouse spleen showing Breg localization within specific niches stained for B cells (anti-IgM/B220–blue), marginal zone macrophage (anti-SIGNR-1–yellow) and IL-10-eGFP (anti-GFP–red).
